# Supplementary material for: Intensive Care Unit Admission for Moderate-to-Severe COVID-19 Patients With Known Cardiovascular Diseases or Their Risk Factors ― Insights From a Nationwide Japanese Cohort Study ―
Source: PubMed Central journal article supplement — Circ Rep. 2021 Jun 25;3(7):375–80. doi: 10.1253/circrep.CR-21-0066 (PMC8258186; doi:10.1253/circrep.cr-21-0066), 2021-06-25
Supplement: circrep-3-375-s001.pdf [file circrep-3-375-s001.pdf]

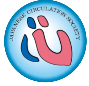

---

**Intensive Care Unit Admission for Moderate-to-Severe  
COVID-19 Patients With Known Cardiovascular  
Diseases or Their Risk Factors**  
— Insights From a Nationwide Japanese Cohort Study —

---

Naofumi Yoshida, MD, PhD; Sachiyo Iwata, MD, PhD; Masato Ogawa, PhD;  
Kazuhiro P. Izawa, PhD; Shunsuke Kuroda, MD, PhD; Shun Kohsaka, MD, PhD;  
Taishi Yonetsu, MD, PhD; Takeshi Kitai, MD, PhD; Sho Torii, MD, PhD;  
Takahide Sano, MD, PhD; Yoshitada Sakai, MD, PhD; Tomoya Yamashita, MD, PhD;  
Ken-ichi Hirata, MD, PhD; Yuya Matsue, MD, PhD;  
Shingo Matsumoto, MD; Koichi Node, MD, PhD

# Supplementary File

(a) Age

non-elderly (Age <65)  
elderly (age ≥65)

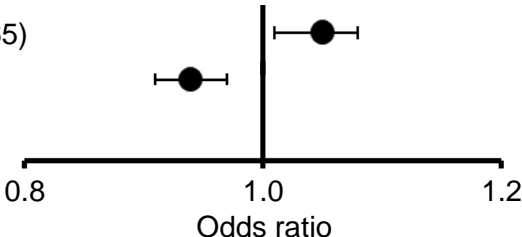

] P for interaction  
P <0.0001

(b) Albumin

non-elderly (Age <65)  
elderly (age ≥65)

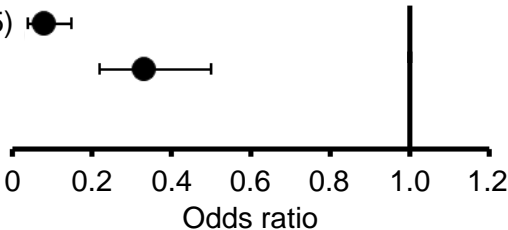

] P for interaction  
P = 0.0038

(c) SpO<sub>2</sub>

non-elderly (Age <65)  
elderly (age ≥65)

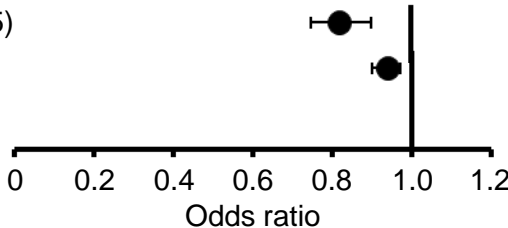

] P for interaction  
P = 0.01

**Supplementary Figure. Forest plots including interaction P value for the predefined subgroup analyses in indicated clinical factors.**
